# Supplementary material for: Fine Regulation of Neutrophil Oxidative Status and Apoptosis by Ceruloplasmin and Its Derivatives
Source: MDPI journal article supplement (doi:10.3390/cells7010008), 2018-01-12

Fig. S1. SDS-PAGE analysis of intact human CP (1), human CP after 2 hrs of limited proteolysis by thrombin (100:1, w/w) and benzamidine-agarose chromatography - CPprot (2) , and apo-CP (3). Coomassie R-250 staining, 20  $\mu$ g loaded.

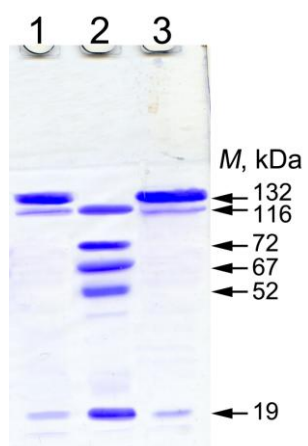

Supplement: s1 [file s1]
